# Supplementary material
Source: PubMed Central journal article supplement (PMC6803349)
Supplement: IAI.00460-19-s0001.pdf [file IAI.00460-19-s0001.pdf]

## Supplemental Figure 1:

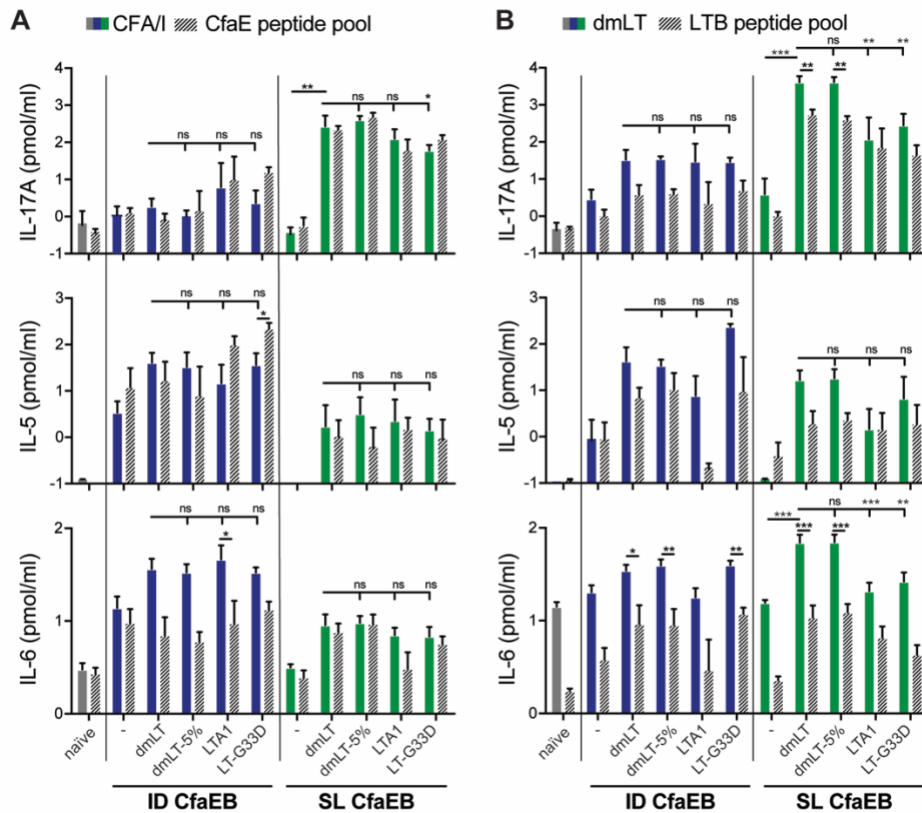

**Supplemental Figure 1.** Ex vivo restimulation of splenocytes from naïve or immunized mice two weeks after receiving prime/boost of 10 µg CfaEB ± dmLT, dmLT in 5% Lactose buffer, LTA1, or LT-G33D by ID or SL delivery on week 0 and 3 (n=4-6 per group). (A) Mean+SEM log<sub>10</sub> cytokine levels in supernatants after CFA/I or CfaE peptide pool protein stimulation. (B) Mean+SEM log<sub>10</sub> cytokine levels in supernatants after dmLT or LTB peptide pool protein stimulation. Significance tested within ID or SL route by one-way ANOVA with Bonferroni's post-test comparing protein to peptide pool within group and all groups to CfaEB+dmLT within protein or peptide pool. Significance shown (\* $P \leq 0.05$ , \*\* $P \leq 0.01$ , \*\*\* $P \leq 0.001$ , "ns" for not significant) for all tests as shown (except for IL-5 with CfaE peptide where LT-G33D ID was significant\*\*\* compared to dmLT ID).
